# Supplementary material for: Different Types of Atrial Fibrillation Share Patterns of Gut Microbiota Dysbiosis
Source: PubMed Central journal article supplement (PMC7082137; doi:10.1128/msphere.00071-20), 2020-03-18

**a** CTR vs. PAF vs. psAF (phylum)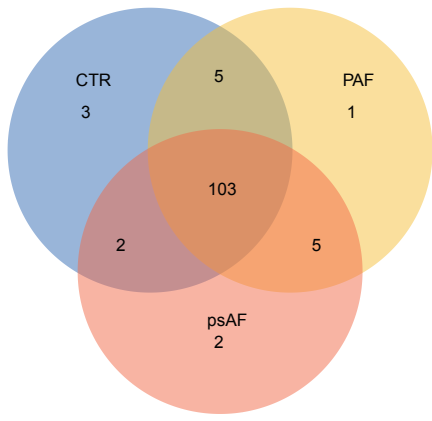**b** CTR vs. PAF vs. psAF (phylum)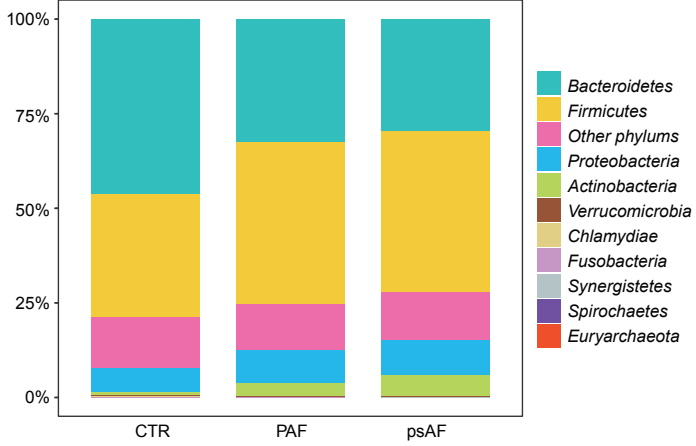**c** CTR vs. PAF vs. psAF (phylum)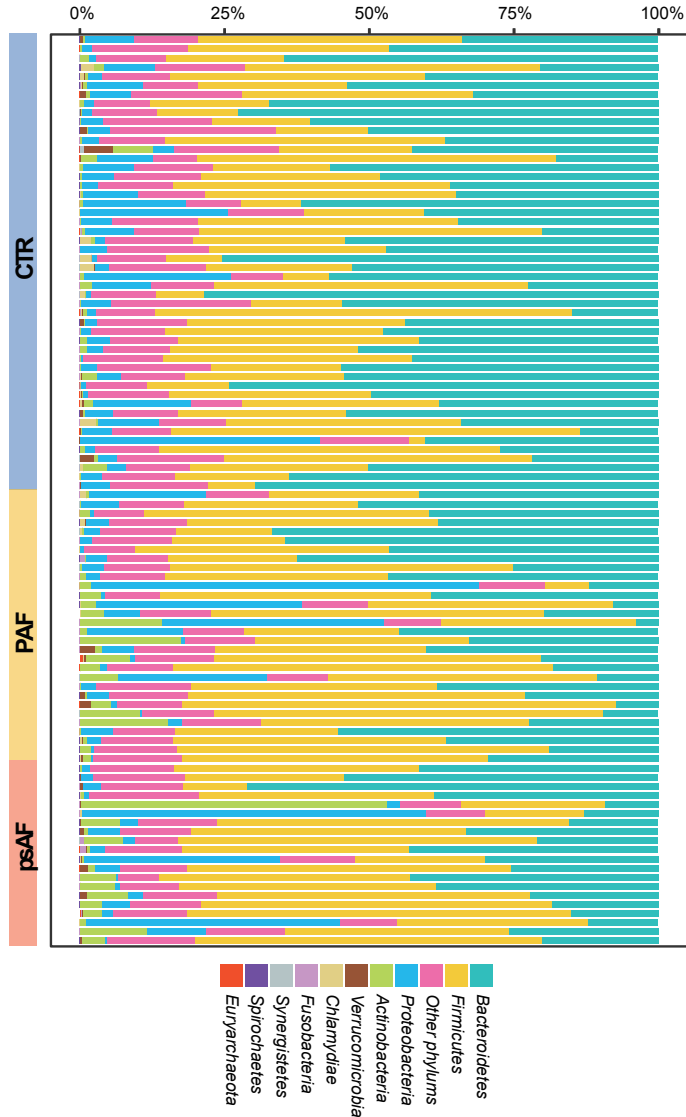**d** CTR vs. PAF vs. psAF (class)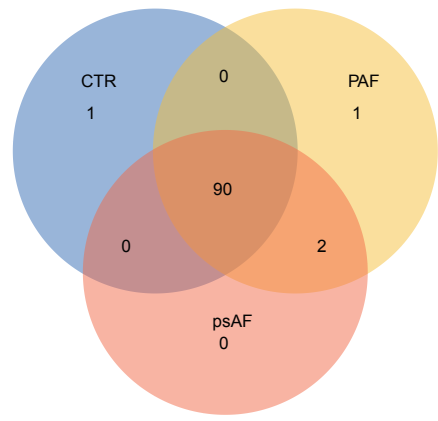**e** CTR vs. PAF vs. psAF (class)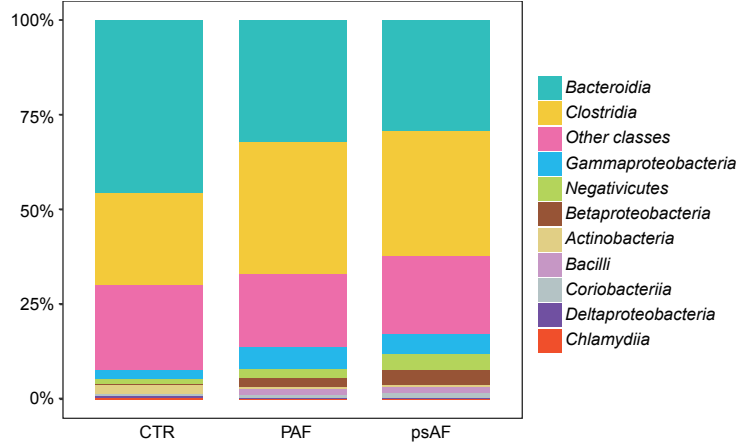**f** CTR vs. PAF vs. psAF (class)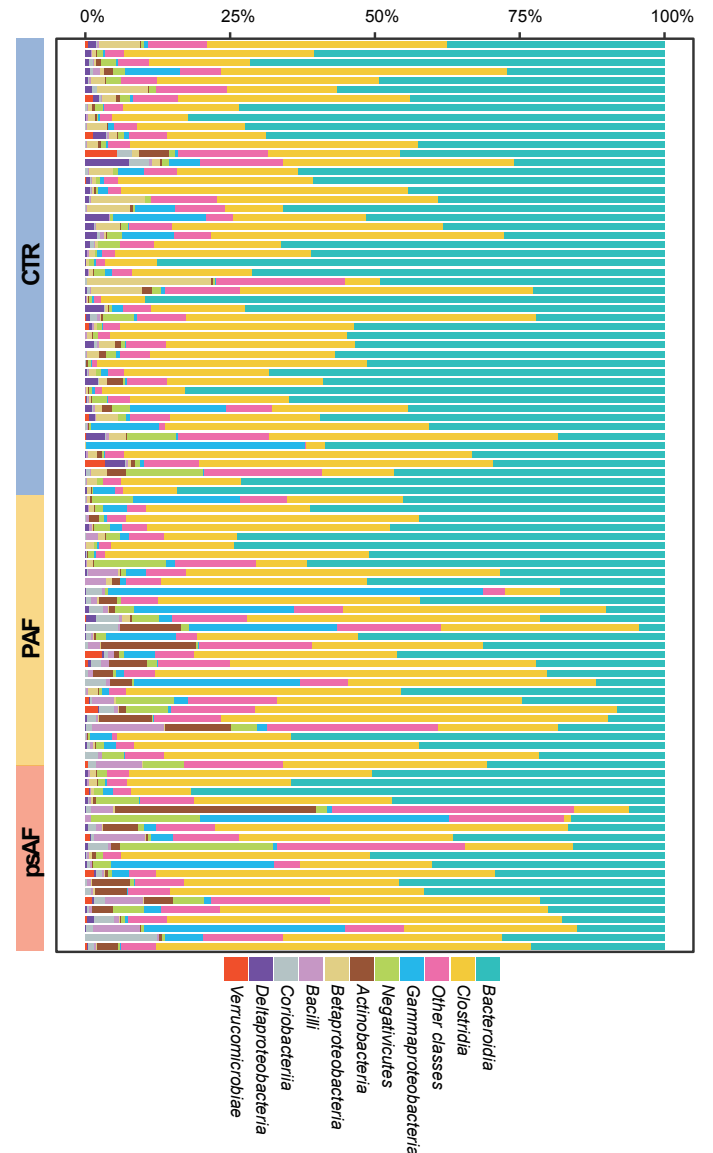

Supplement: mSphere.00071-20-sf001.pdf [file mSphere.00071-20-sf001.pdf]
