# Supplementary material for: Different Types of Atrial Fibrillation Share Patterns of Gut Microbiota Dysbiosis
Source: PubMed Central journal article supplement (PMC7082137; doi:10.1128/msphere.00071-20), 2020-03-18

**a**

CTR vs. PAF vs. psAF (order)

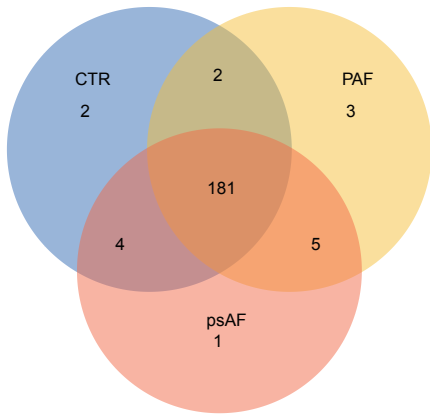**b**

CTR vs. PAF vs. psAF (order)

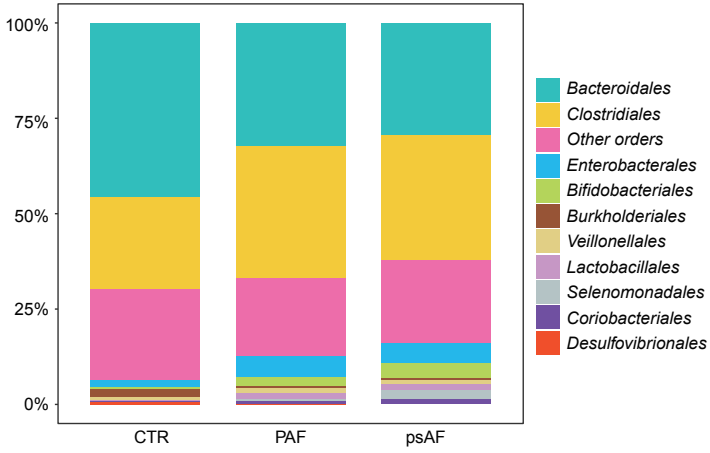**c**

CTR vs. PAF vs. psAF (order)

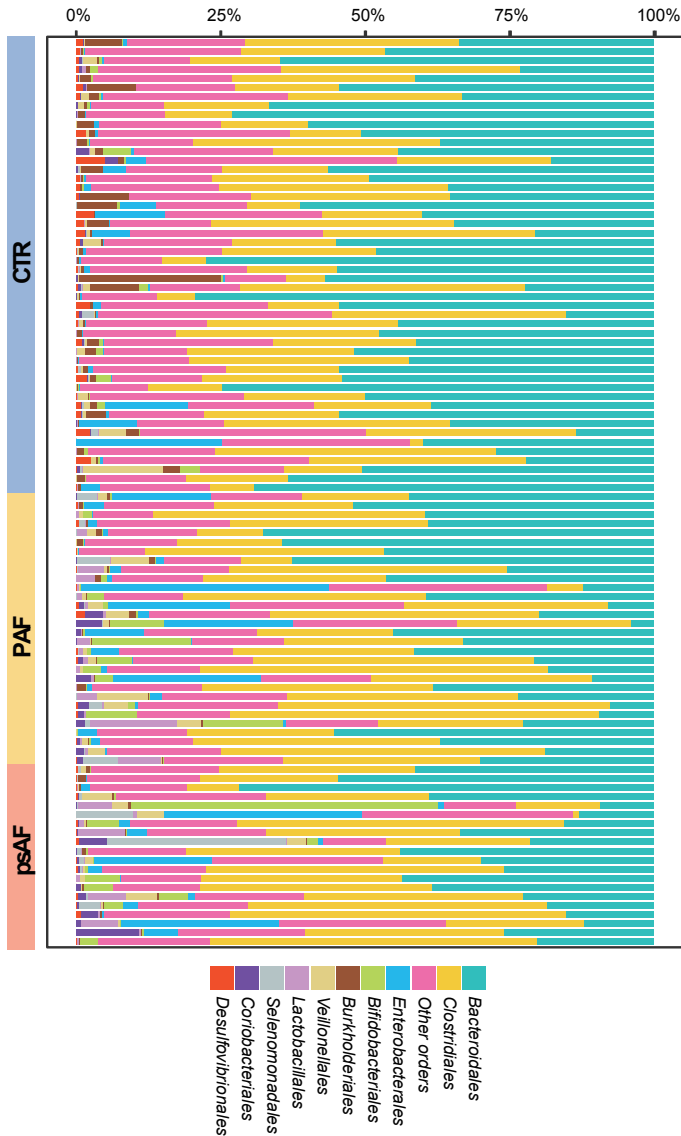**d**

CTR vs. PAF vs. psAF (family)

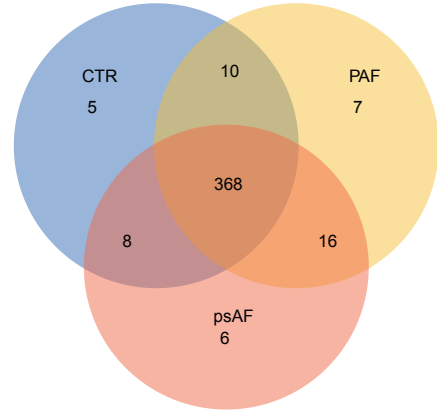**e**

CTR vs. PAF vs. psAF (family)

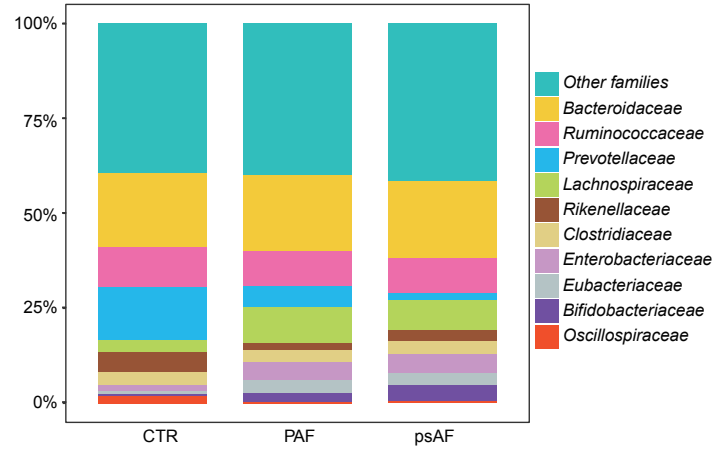**f**

CTR vs. PAF vs. psAF (family)

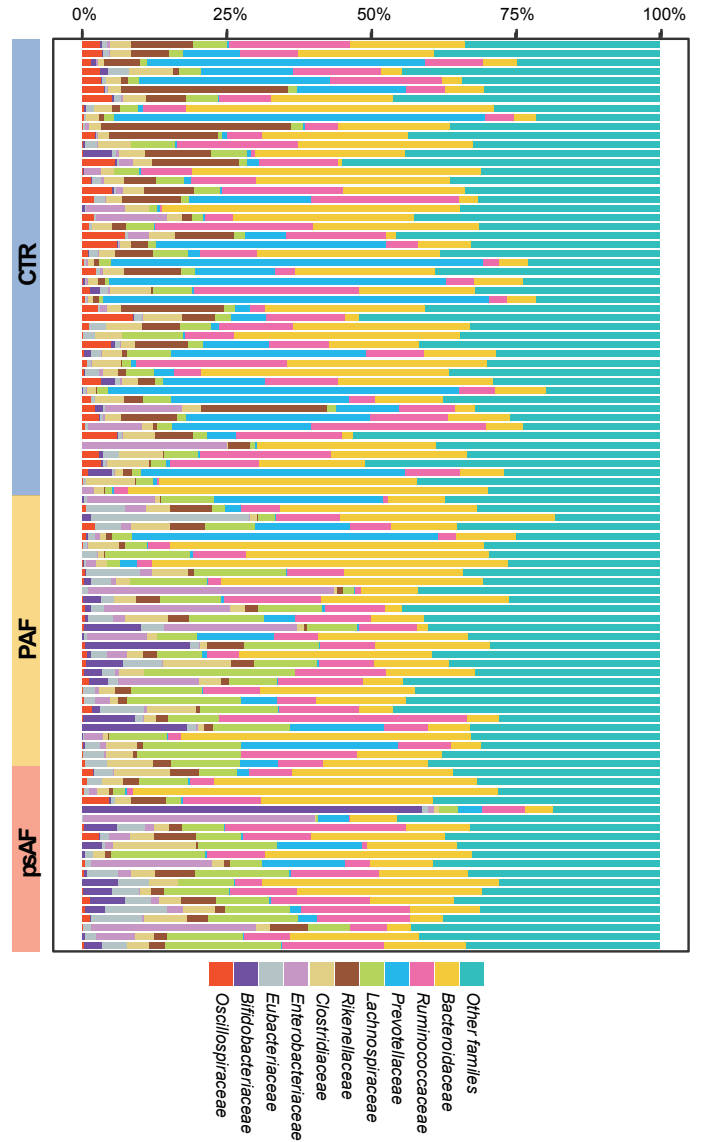

Supplement: mSphere.00071-20-sf002.pdf [file mSphere.00071-20-sf002.pdf]
