# Supplementary material for: Different Types of Atrial Fibrillation Share Patterns of Gut Microbiota Dysbiosis
Source: PubMed Central journal article supplement (PMC7082137; doi:10.1128/msphere.00071-20), 2020-03-18

**a** CTR vs. PAF vs. psAF (genus)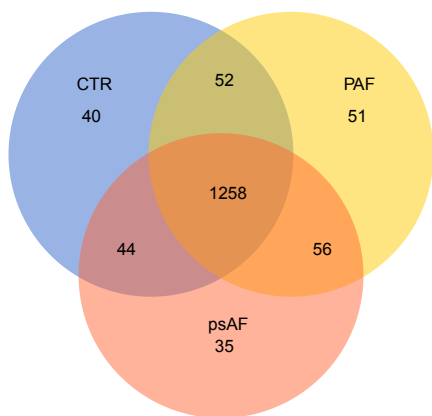**b** CTR vs. PAF vs. psAF (genus)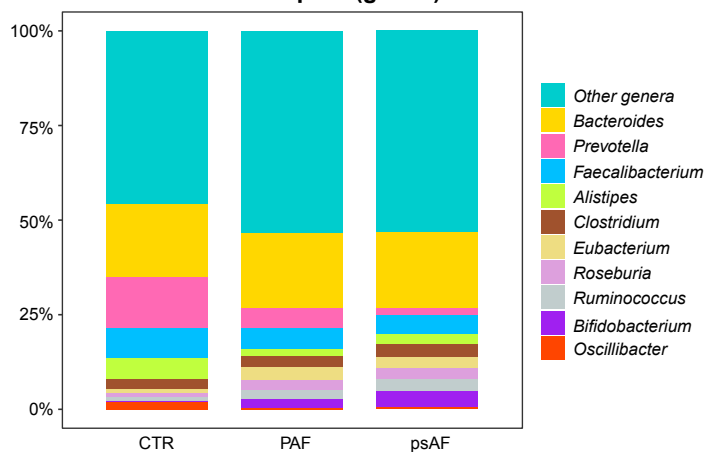**c** CTR vs. PAF vs. psAF (genus)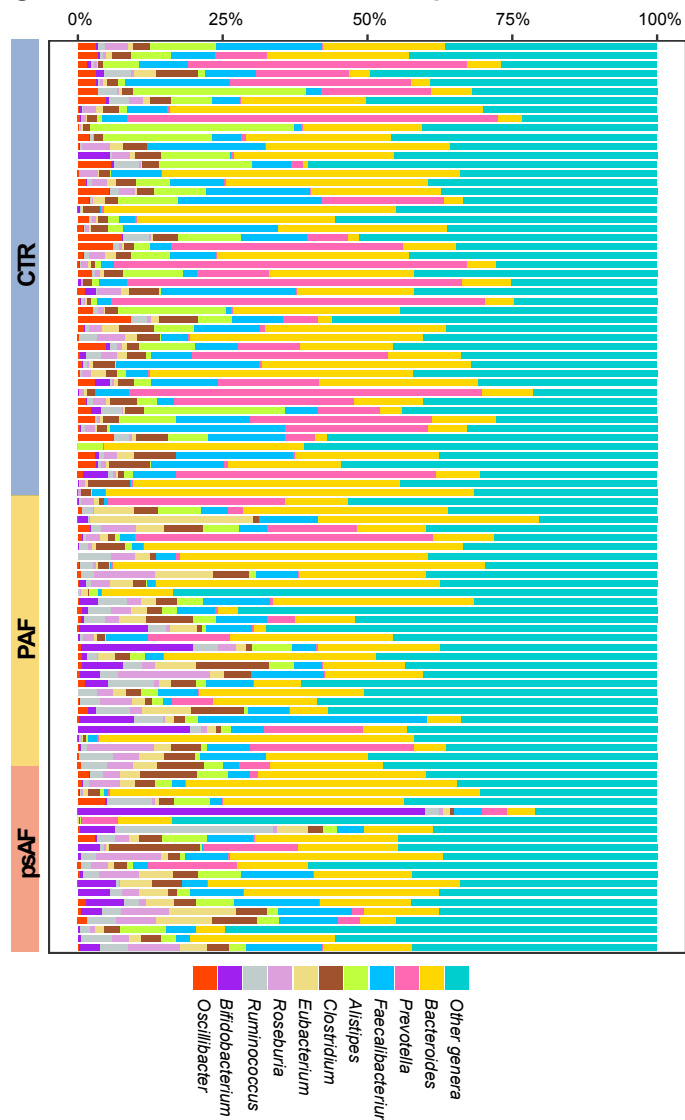**d** CTR vs. PAF vs. psAF (species)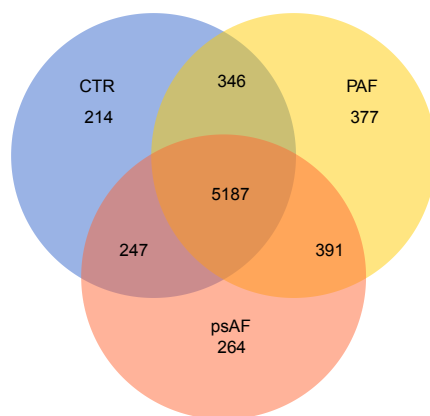**e** CTR vs. PAF vs. psAF (species)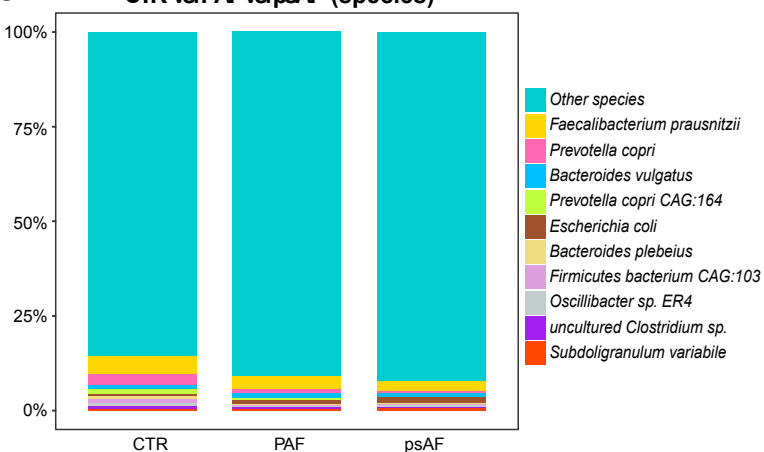**f** CTR vs. PAF vs. psAF (species)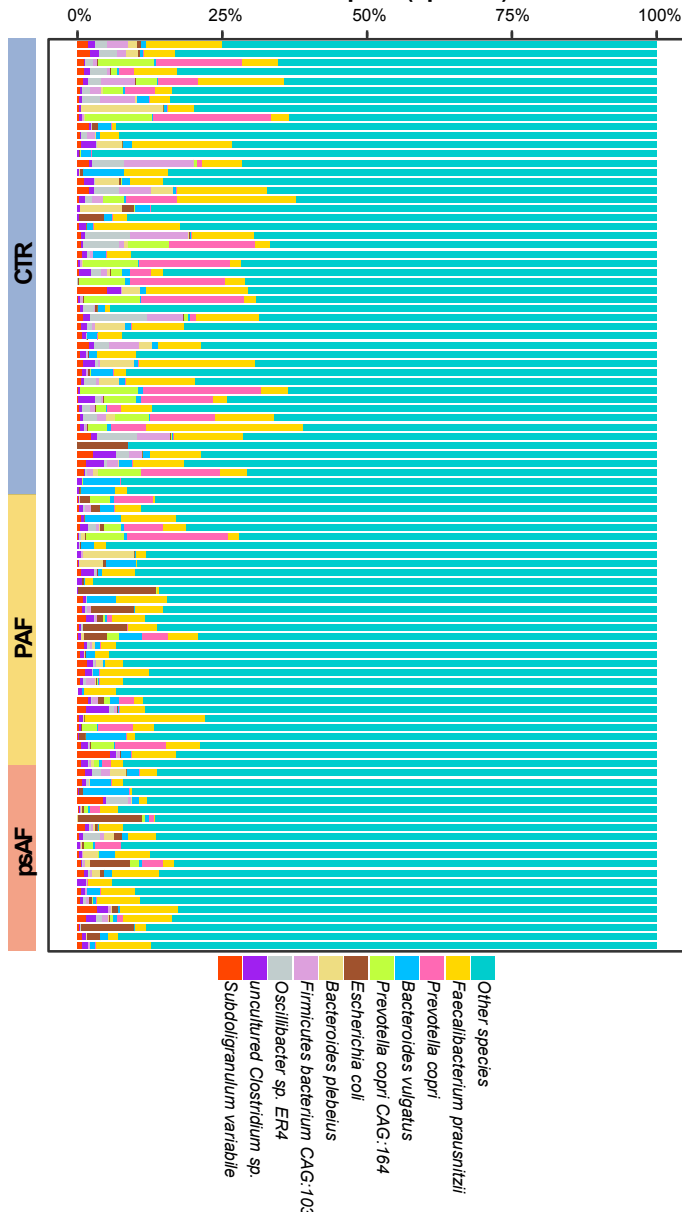

Supplement: mSphere.00071-20-sf003.pdf [file mSphere.00071-20-sf003.pdf]
