# Supplementary material for: Different Types of Atrial Fibrillation Share Patterns of Gut Microbiota Dysbiosis
Source: PubMed Central journal article supplement (PMC7082137; doi:10.1128/msphere.00071-20), 2020-03-18

**a**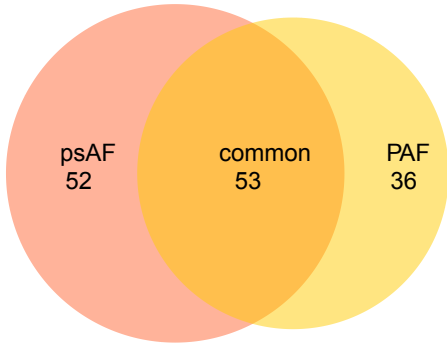**c**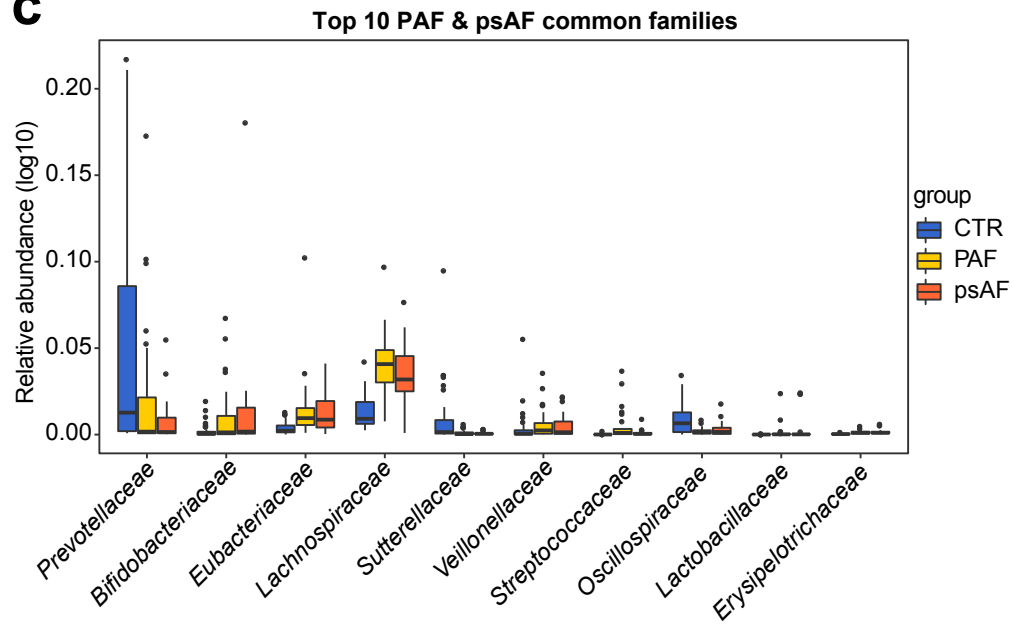**b****53 PAF & psAF common families**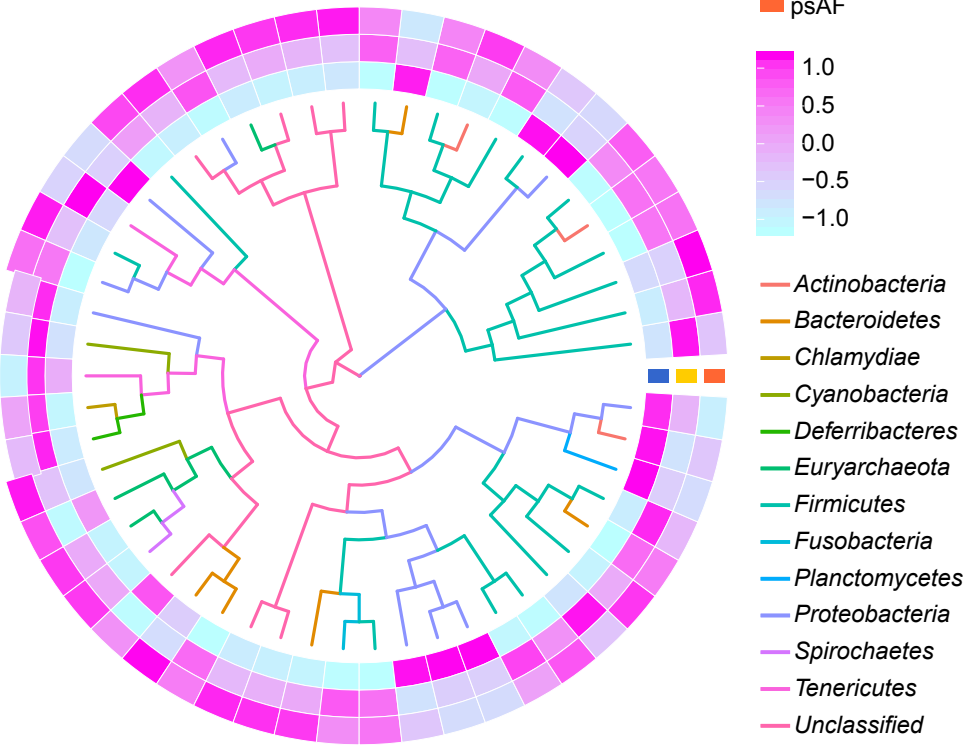**d**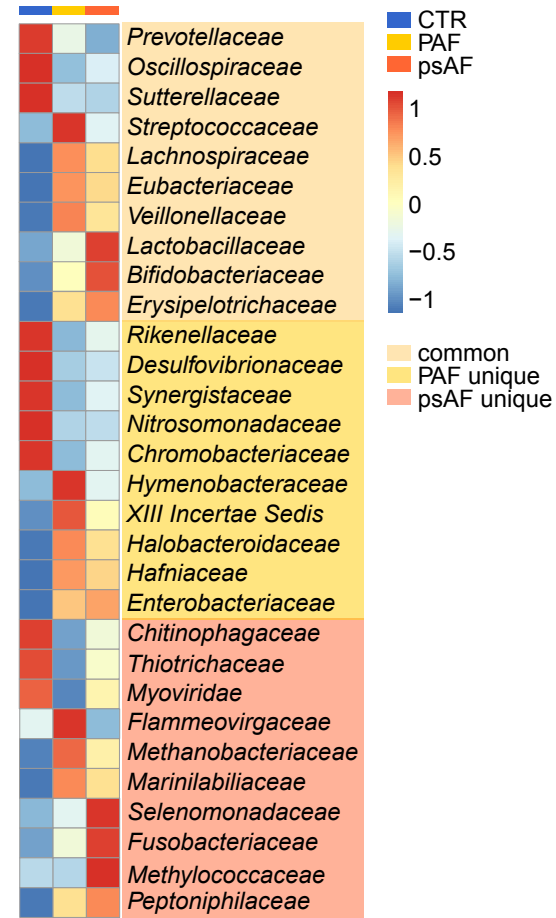

Supplement: mSphere.00071-20-sf004.pdf [file mSphere.00071-20-sf004.pdf]
