# Supplementary material for: Different Types of Atrial Fibrillation Share Patterns of Gut Microbiota Dysbiosis
Source: PubMed Central journal article supplement (PMC7082137; doi:10.1128/msphere.00071-20), 2020-03-18

**a**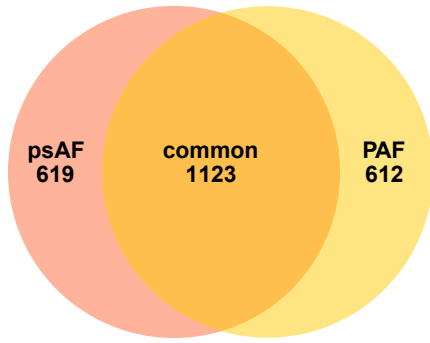**b**

1123 PAF &amp; psAF common species

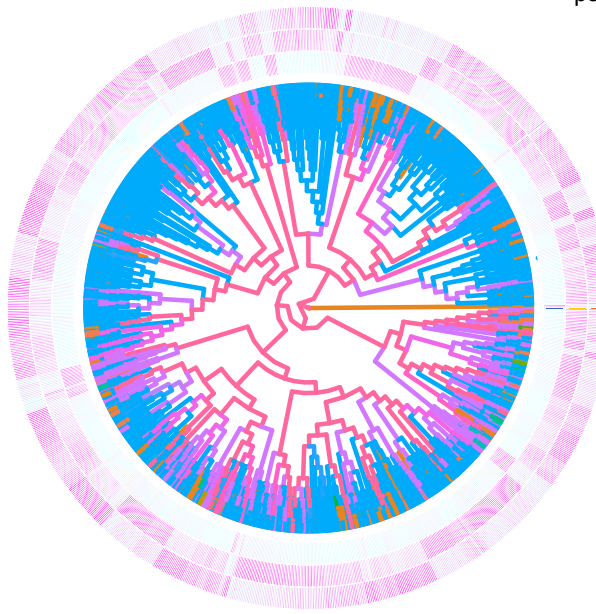

— Spirochaetes — Thermotogae  
— Synergistetes — Unclassified  
— Tenericutes — Verrucomicrobia

z-score  
CTR PAF psAF  
-1.0 -0.5 0.0 0.5 1.0

— Acidobacteria  
— Actinobacteria  
— Bacteroidetes  
— Candidatus Acetothermia  
— Candidatus Aminicenantes  
— Candidatus Dadabacteria  
— Candidatus Giovannonibacteria  
— Candidatus Magasanikbacteria  
— Candidatus Parvarchaeota  
— Candidatus Terrybacteria  
— Candidatus Woesebacteria  
— Candidatus Yanofskybacteria  
— Chlamydiae  
— Chlorobi  
— Chloroflexi  
— Cryptomycota  
— Cyanobacteria  
— Deinococcus Thermus  
— Dictyoglomi  
— Elusimicrobia  
— Euryarchaeota  
— Firmicutes  
— Fusobacteria  
— Gemmatimonadetes  
— Mucoromycota  
— Planctomycetes  
— Proteobacteria  
— Rhodothermaeota

**c**

Top 10 PAF &amp; psAF common species

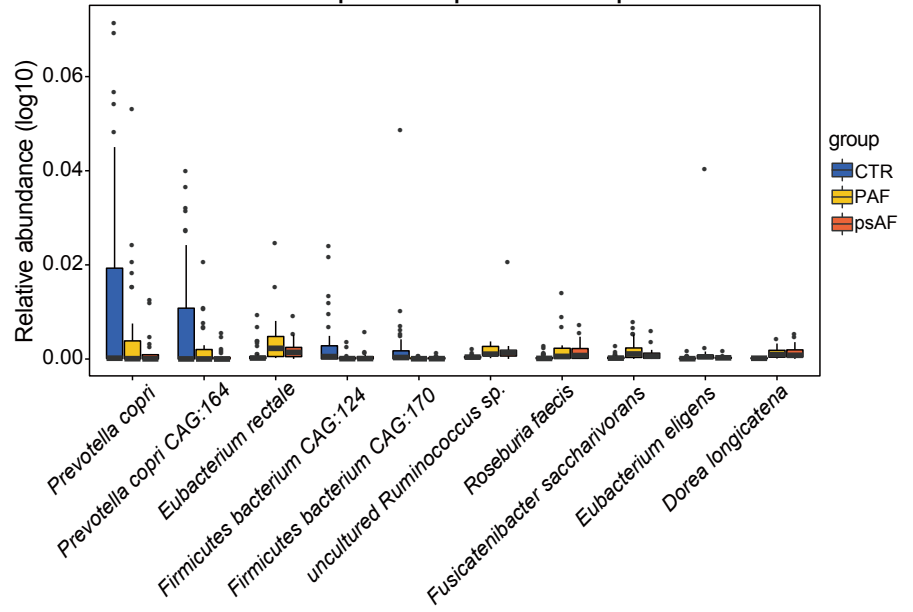**d**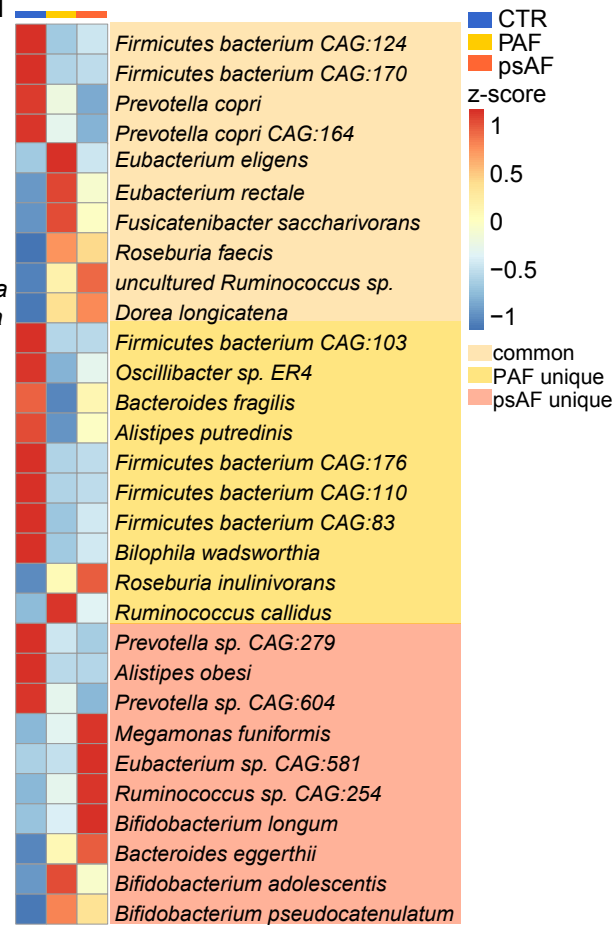

Supplement: mSphere.00071-20-sf005.pdf [file mSphere.00071-20-sf005.pdf]
